# Supplementary material for: Crop damage by vertebrates in Latin America: current knowledge and potential future management directions
Source: PeerJ. 2022 Mar 25;10:e13185. doi: 10.7717/peerj.13185 (PMC8958972; doi:10.7717/peerj.13185)
Supplement: Supplemental Information 5 [file peerj-10-13185-s005.xlsx]

## Sheet: All data
Article	Author	Publication Year	Type of study 1	Type of study 2	Type of study 3	Study period start	Study period end	Country 1	Location 1	Location 2	Location 3	Location 4	Location 5	Location 6	Location 7	Location 8	Location 9	Location 10	Location 11	Location 12	Location 13	Location 14	Exact Coordinates provided	Map provided	Location Notes	Latitude 1	Longitude 1	Latitude 2	Longitude 2	Latitude 3	Longitude 3	Latitude 4	Longitude 4	Latitude 5	Longitude 5	Latitude 6	Longitude 6	Latitude 7	Longitude 7	Latitude 8	Longitude 8	Latitude 9	Longitude 9	Latitude 10	Longitude 10	Latitude 11	Longitude 11	Latitude 12	Longitude 12
1	Abba et al.	2015	Crop-feeding species behavior			2011-12-01	2013-06-01	Argentina	Rolling Pampas	Flat Inland Pampas	West Inland Pampas	Flooding Pampas	Southern Pampas										No	Yes	Approximate middle point for each of the regions found using GE, based on provided map	-34.4169	-60.4072	-35.4281	-62.1458	-36.6042	-62.91	-36.4214	-58.5411	-38.3842	-60.2508
2	Abrahams et al.	2018	Crop damage evaluation	Farmer perception		April-August 2013	April-August 2015	Brazil	Medio Juara														No	Yes	Locations more than 50km apart, approximate middle point found using GE, based on provided map	-5.55443	-67.7015
3	Aguiar et al.	2011	Crop-feeding species behavior			2002	2008	Brazil	Telêmaco Borba														Yes	No		-24.2117	-50.5581
4	Albarracín and Aliaga-Rossel	2018	Crop damage evaluation	Farmer perception		2011-02-01	2011-04-01	Bolivia	Lambete														No	Yes	Approximate middle point found using GE	16°30’ – 16°40’S	67°30’ – 67°45’W
5	Aris et al.	2008	Farmer perception			2006-08-01	2006-08-01	Peru	Chiquintirca	Auquiraccay	Sacharaccay												Yes	No	Locations within 50 km of each other, Approximate middle point found using GE	-13.0604	-73.7068	-13.0973	-73.7586	-13.0795	-73.8497
6	Arroyo-Quiroz et al.	2017	Farmer perception			2004	2010	Mexico	Sierra Gorda Biosphere Reserve														No	Yes	Approximate location found using GE, based on named reserve	21.305	-99.4564
7	Avery et al.	2001	Crop protection experiment			?	?	Venezuela	Acarigua														No	No	Ex-situ experiment, approximate location of where birds where captured found using GE	9.54402	-69.1864
8	Barceló et al.	2012	Farmer perception			?	?	Mexico	Laguna de Mexicanos	Presa San Carlos	Laguna de Santiaguillo	Laguna de San Juan de Ahorcados											No	Yes	Approximate locations found using GE, based on named places	28.6562	-106.102	26.8883	-103.935	24.9104	-104.913	22.7636	-102.589
9	Basili and Temple	1999	Crop damage evaluation	Farmer perception		1995-05-01	1995-06-01	Venezuela	Portuguesa														No	No	Approximate location found using GE, based on named region	9.095	-69.0992
10	Basili and Temple	1999	Crop-feeding species behavior	Farmer perception		1990	1995	Venezuela	Venezuelan llanos														No	Yes	Approximate location found using GE, based on named region	9.095	-69.0992
11	Berón et al.	2020	Crop damage evaluation			2014-12-01	2015-05-01	Argentina	Angel Gallardo														Yes	Yes		-31.555	-60.6769
12	Bou et al.	2016	Crop damage evaluation			2012-11-01	2013-01-01	Uruguay	Paysandu	Rio Negro	Soriano	Colonia	San Jose										No	Yes	Approximate locations found using GE, based on provided map	-31.9892	-58.1075	-32.5636	-57.9856	-33.2633	-58.0219	-34.2083	-57.6803	-34.5911	-56.6089
13	Boulton et al.	1996	Farmer perception	Crop damage evaluation		1980	1994	Barbados															No	Yes	Country-wide study, used central point for Barbados	13.1882	-59.5353
14	Bourne	1981	Crop-feeding species behavior			1973	1974	Guyana	Burma														Yes	No		6.46667	-57.75
15	Bruggers et al.	1998	Pest species or outbreak overview			1991	1996	Argentina, Uruguay	Salto Grande Binational Area														No	Yes	Approximate location found using GE, based on named region	-31.2167	-57.9333
16	Bucher and Aramburú	2014	Crop-feeding species behavior			?	?	Argentina	Pampas														No	Yes	Approximate location found using GE, based on named region	-36.2678	-60.3192
17	Bucher and Ranvaud	2006	Pest species or outbreak overview			-	-	Argentina, Colombia, Uruguay, Bolivia, Brazil	Cordoba	Entre Rios	San Luis	Chaco	Salta	Cauca valley	Santa Cruz	Sao Paulo	Parana						No	No	Approximate locations found using GE, based on named regions	-32.2953	-63.5825	-32.5169	-59.1042	-33.8761	-66.2375	-26.5847	-60.9542	-25.2489	-64.7183	3.8025	-76.6431	-17.8131	-63.1575	-23.5528	-46.6411	-25.2406	-52.0297
18	Calamari et al.	2018	Crop-feeding species behavior			2003	2011	Argentina															No	Yes	Approximate middle point of study region found using GE	-31.6181	-60.7063
19	Canavelli et al.	2013	Farmer perception			2006-08-01	2007-05-01	Argentina	Parana														No	No	Approximate location found using GE, based on named region	-31.6125	-60.0783
20	Canavelli et al.	2012	Pest species or outbreak overview	Protection technique evaluation		-	-	Argentina															No	Yes	Country-wide study, used central point for Argentina	-38.453	-63.5989
21	Canavelli et al.	2014	Crop damage evaluation					Argentina	Parana														No	Yes	Approximate location found using GE, based on named region	-31.6125	-60.0783
22	Can-Hernandez et al.	2019	Farmer perception	Crop damage evaluation		2016-01-01	2016-08-01	Mexico	National Protected Area Agua Blanca (Tabasco)														No	Yes	Locations within 50 km of each other, Approximate middle point found using GE	17.6001	-92.4294	17.5733	-92.4838
23	Castilho et al.	2018	Farmer perception			2012-10-01	2014-06-01	Brazil	Una Biological Reserve	Una Wildlife Refuge	Serra das Lontras National Park												No	Yes	Approximate location found using GE, based on named protected area	-15.1636	-39.3458
24	Castillo-Chinchilla et al.	2018	Farmer perception			2011-07-01	2011-11-01	Costa Rica	Parque Nacional Barra Honda														Yes	Yes		10.19	-85.3644
25	Castillo-Lopez et al.	2017	Crop protection experiment	Farmer perception	Crop damage evaluation	2014-07-01	2015-01-01	Colombia	Valle de Tenza														No	No	Locations within 50 km of each other, Approximate middle point found using GE, based on named cities	5.08245	-73.365	5.13994	-73.3971	5.09541	-73.4446	5.07731	-73.4215	4.98576	-73.433
26	Cervo and Guadagnin	2020	Crop-feeding species behavior			2015-06-01	2016-10-01	Brazil	Santa Lucia Farm	Andre da Rocha	Campestre da Serra	Cambara do Sul	Sao Francisco de Paula	Alegrete	Santana do Livramento	Dom Pedrito	Encruzilhada do Sul						No	Yes	Approximate locations found using GE, based on named cities	-16.7197	-56.8389	-28.6318	-51.5735	-28.7965	-51.0955	-29.0479	-50.1435	-29.4419	-50.5797	-29.7914	-55.7813	-30.8722	-55.5208	-30.9734	-54.667	-30.5459	-52.5247
27	Chaves and Bicca-Marques	2017	Crop damage evaluation	Crop-feeding species behavior	Farmer perception	2012-01-01	2014-06-01	Brazil	Porto Alegre														Yes	Yes	Locations within 50 km of each other, Approximate middle point found using GE	-30.1836	-51.1018	-30.2051	-51.1016	-30.2074	-51.0983
28	Cirne and López-Iborra	2005	Crop-feeding species behavior			1999-02-01	2000-03-01	Brazil	Rio Grande do Sul														Yes	No		-32.2	-52.5833
29	Codesido and Bilenca	2015	Crop-feeding species behavior			2006-01-01	2008-02-01	Argentina	Buenos Aires														No	Yes	Approximate location found using GE, based on named region	-36.2678	-60.3192
30	Cornejo	2000	Crop damage evaluation	Crop protection experiment		1998-12-01	1999-02-01	Mexico	Veracruz														No	No	Approximate location found using GE, based on named city	19.542	-96.8849
31	Correa et al.	2018	Crop-feeding species behavior					Brazil	Porto Alegre														Yes	Yes		-30.2392	-51.0897
32	Cossios et al.	2018	Farmer perception			2010-10-01	2011-08-01	Peru	Tapuc	Vilcabamba	San Pedro de Pillao	Rocco	Chacayan										Yes	Yes	Locations within 50 km of each other, Approximate middle point found using GE	-10.4549	-76.4617	-10.4787	-76.4472	-10.44	-76.5	-10.48	-76.49	-10.3886	-76.283
33	Costán & Sarasola	2017	Crop-feeding species behavior			2010-03-01	2011-11-01	Argentina	Parque Luro Reserve														Yes	No		-36.9136	-64.2614
34	Dardanelli et al.	2016	Crop-feeding species behavior			2012-11-01	2012-12-01	Argentina	Entre Rios														No	Yes	Approximate location found using GE, based on named region	-32.5169	-59.1042
35	de Almeida-Jácomo et al.	2013	Crop-feeding species behavior			2000-07-01	2003-05-01	Brazil	Emas National Park														Yes	Yes		-18.3167	-52.75
36	de Carvalho et al.	2019	Farmer perception			2014-07-01	2014-09-01	Brazil	Campo das Vertentes														No	Yes	Approximate middle point found using GE, based on provided map	-21.1311	-44.2533
37	de Freitas et al.	2008	Crop-feeding species behavior			2000-07-01	2001-07-01	Brazil	Franca														No	No	Approximate middle point found using GE	-20.5125	-47.3083
38	del Villar-González	2000	Pest species or outbreak overview			1996	1996	Mexico															No	No	Country-wide study, used central point for Mexico	22.5175	-101.613
39	Dore et al.	2018	Farmer perception			2010-06-01	2011-08-01	Saint Kitts and Nevis															No	Yes	Island-wide study, approximate middle-point found using GE	17.3154	-62.7428
40	Doutel-Ribas et al.	2019	Protection technique evaluation	Crop-feeding species behavior		2014-04-01	2014-08-01	Brazil	Rio Brilhante														Yes	Yes	Locations within 50 km of each other, Approximate middle point found using GE	-21.9079	-54.2238	-21.6911	-54.2348
41	Eiris and Barreto	2009	Crop-feeding species behavior			2003-10-01	2004-04-01	Venezuela	Guárico River Irrigation System,														Yes	No		8.84528	-67.5428
42	Engeman et al.	2010	Farmer perception	Crop damage evaluation		2006-11-01	2006-12-01	Puerto Rico															No	No	Approximate location found using GE, based on named region	18.0383	-67.0061
43	Escobar-Lasso et al.	2020	Farmer perception	Crop damage evaluation		2017-04-01	2018-03-01	Colombia	Barbas-Bremen Soil Conservation District														No	Yes	Approximate locations found using GE, based on provided map	4.72833	-75.6361
44	Felix et al.	2014	Crop damage evaluation	Crop-feeding species behavior	Farmer perception	2010-04-01	2011-09-01	Brazil	Dourados MS														Yes	Yes		-22.2217	-54.8064
45	Ferraz et al.	2003	Crop damage evaluation			?	?	Brazil	Piracicaba SP														Yes	Yes		-22.7083	-47.6417
46	Ferraz et al.	2007	Crop-feeding species behavior			2001-10-01	2002-12-01	Brazil	Piracicaba River Basin														No	Yes	Approximate middle point of study region found using GE, based on provided map	-22.7083	-46.9667
47	Ferraz et al.	2009	Crop-feeding species behavior			?	?	Brazil	Piracicaba River Basin														No	Yes	Approximate middle point of study region found using GE, based on provided map	-22.7083	-46.9667
48	Figueroa	2013	Crop-feeding species behavior			2001	2012	Venezuela, Ecuador, Colombia, Peru and Bolivia	ACR Bosques Secos de Salitral-Huarmaca	ACP Huiquilla	PN Cutervo	RVS Laquipampa	ACP Chaparrí	PN Huascarán	PN Yanachaga Chemillén	BP San Matías San Carlos	SN Megantoni	PN Manu	SH Machu Picchu	ACR Choquequirao	RC Amarakaeri	PN Bahuaja Sonene	Yes	Yes		-5.53583	-79.7628	-6.36778	-78.0022	-6.13917	-78.725	-6.35306	-79.4814	-6.69778	-79.3594	-9.15278	-77.6475	-10.3258	-75.3889	-10.6569	-75.0178	-12.2617	-71.2844	-13.1831	-71.6181	-13.2261	-72.495	-13.3886	-72.8817
49	Flores-Armillas et al.	2020	Farmer perception	Crop damage evaluation		2016	2018	Mexico	Sierra de Huautla Biosphere Reserve														No	Yes	Approximate middle point found using GE	18.464	-98.9731
50	Fuentes and Campusano	1985	Pest species or outbreak overview	Farmer perception		?	?	Chile	Vicuña	La Serena													No	No	Approximate locations found using GE, based on named cities	-30.0322	-70.7081	-29.9022	-71.2519
51	Galetti	1993	Crop-feeding species behavior			1988-08-01	1991-12-01	Brazil	Santa Genebra Reserve														Yes	No		-22.7833	-49.1167
52	García and Peiró	2016	Crop-feeding species behavior	Crop damage evaluation		2013-01-01	2013-12-01	Cuba	Rodas														Yes	Yes		22.3634	-80.5572
53	García-Mendoza and Prieto-Rosales	2019	Crop damage evaluation			2018	2019	Peru	Pilcos														Yes	No		-12.4083	-74.6767
54	Gonzalez and Acosta-Perez	2002	Crop damage evaluation			2000-05-01	2000-09-01	Mexico	Morelos														No	No	Approximate location found using GE, based on named city	18.8729	-98.9141
55	Gorosábel et al.	2019	Crop damage evaluation			2017-05-01	2017-12-01	Argentina	Buenos Aires														Yes	No		-38.3739	-60.2797	-38.348	-59.6183
56	Hilje	1992	Pest species or outbreak overview					Costa Rica															No	No	Country-wide study, used central point for Costa Rica	9.91681	-84.0743
57	Horrocks and Baulu	1988	Protection technique evaluation			1979	1986	Barbados															No	No	Country-wide study, used central point for Barbados	13.1882	-59.5353
58	Horrocks and Baulu	1994	Farmer perception	Crop damage evaluation		1980	1980	Barbados															No	No	Country-wide study, used central point for Barbados	13.1882	-59.5353
59	Horváth et al.	2001	Crop-feeding species behavior			1996-02-01	1996-10-01	Mexico	Montebello														No	Yes	Approximate location found using GE, based on named protected area	16.1086	-91.6992
60	Ibañez et al.	2016	Crop damage evaluation			2014	2015	Argentina	City Bell														Yes	No		-34.8833	-58.0667
61	Jackson	1988	Pest species or outbreak overview			?	?	Argentina															No	No	Country-wide study, used central point for Argentina	-38.453	-63.5989
62	Key and de la Piedra Constantino	1992	Protection technique evaluation			1991	1992	Mexico	Tuxtla Gutierrez	Villaflores	Comitan	Tapachula											No	Yes	Approximate locations found using GE, based on named cities	16.746	-93.1296	16.2351	-93.2563	16.2327	-92.1304	14.9114	-92.278
63	Lima et al.	2019	Pest species or outbreak overview	Farmer perception				Brazil	Mato Grosso														No	Yes	Study summarizes information from a whole state, location of central point of the state	-12.6764	-56.9236
64	Lins and Ferreira	2018	Crop-feeding species behavior			2014-02-01	2014-12-01	Brazil	Paraiba														Yes	No	Minutes and seconds over 60???, approximate location found using GE, based on mentioned city	-7.5164	-34.9203
65	Lobao and Nogueira-Filho	2011	Crop damage evaluation	Farmer perception		?	?	Brazil	Arataca	Buerarema	Ilheus	Itabuna	Sao Jose da Vitoria	Una									Yes	No	Locations within 50km of each other, approximate middle point found using GE	-15.25	-39.4	-14.95	-39.2833	-14.7833	-39.0333	-14.7833	-39.2667	-15.0833	-39.3333	-15.2833	-39.0667
66	López-Torres et al.	2012	Crop-feeding species behavior			2004-10-01	2006-09-01	Puerto Rico	San Juan Bay Estuary														Yes	Yes	Locations within 50 km of each other, approximate middle point found using GE	18.4333	-66.0667	18.4167	-65.9667	18.3667	-65.6167
67	Loza-del-Carpio et al.	2016	Crop damage evaluation			2010-10-01	2011-04-01	Peru	Puno														Yes	No		-15.2333	-70.7167
68	MacGregor-Fors et al.	2011	Pest species or outbreak overview			?	?	Mexico	Loreto River	Morelia	Celaya	Mexico City	Puebla	Oaxaca	Tuxtla Gutierrez								No	Yes	Approximate locations found using GE, based on named cities	26.0117	-111.348	19.7061	-101.195	20.5278	-100.811	19.4328	-99.1331	19.0414	-98.2064	17.0731	-96.7264	16.7517	-93.1031
69	Marchand	2016	Farmer perception			2011-06-01	2013-01-01	Brazil	Uatuma														No	Yes	Locations within 50 km of each other, Approximate middle point found using GE, based on provided map	-2.45462	-58.2689
70	McKinney	2011	Crop-feeding species behavior			2006-01-01	2007-12-01	Costa Rica	Curú Wildlife Refuge														Yes	Yes		9.79556	-84.9208
71	McKinney	2019	Crop-feeding species behavior			2006-01-01	2007-12-01	Costa Rica	Curú Wildlife Refuge														No	Yes	Coordinates taken from another study by the same author in the same wildlife refuge	9.79556	-84.9208
72	Melo and Cheschini	2012	Crop damage evaluation			2006-02-01	2007-04-01	Brazil	Uberlândia														No	No	Approximate location found using GE, based on named place	-18.9488	-48.2174
73	Mendonça et al.	2011	Farmer perception			2007	2010	Brazil	Paraíba														Yes	Yes		-7.07667	-36.0611
74	Mitchell and Bruggers	1985	Crop damage evaluation	Crop protection experiment		1980	1981	Dominican Republic	San Francisco de Macoris														No	No	Approximate location found using GE, based on named city	19.2981	-70.2564
75	Monge	1999	Crop damage evaluation			?	?	Costa Rica	Country wide														No	Yes	Country-wide study, used central point for Costa Rica	9.91681	-84.0743
76	Monge	2013	Pest species or outbreak overview			?	?	Costa Rica															No	No	Country-wide study, used central point for Costa Rica	9.91681	-84.0743
77	Monge-Meza	2011	Pest species or outbreak overview					Costa Rica	Pococi	Guacimo													No	Yes	Approximate location found using GE, based on named region	10.2489	-83.6392
78	Monge-Meza and Orozco	2010	Crop damage evaluation			2008-02-01	2009-02-01	Costa Rica	Santa Cecilia de la Cruz														Yes	No		11.0667	-85.5833
79	Monge-Meza et al.	2014	Crop damage evaluation			2006-08-01	2007-12-01	Costa Rica	Alajuela														Yes	No		10.1833	-84.2667
80	Naughton-Treves et al.	2003	Crop-feeding species behavior	Crop damage evaluation		1998-07-01	2000-01-01	Peru	Puerto Maldonado														No	Yes	Approximate location found using GE, based on provided map	-12.6564	-69.271
81	Olivera et al.	2016	Protection technique evaluation			?	?	Uruguay	Montevideo														No	No	Approximate locations found using GE, based on named facilities	-34.9008	-56.1644
82	Parra et al.	2012	Crop damage evaluation			2009	2010	Venezuela	Rio Guarico														Yes	No		-8.75	-67.5333
83	Pedrana et al.	2014	Crop-feeding species behavior			2011-06-01	2012-07-01	Argentina	Southern Pampas														No	Yes	Approximate locations found using GE, based on provided map	-38.595	-61.4628
84	Pedrosa et al.	2015	Pest species or outbreak overview			2014-05-01	2014-12-01	Brazil															No	Yes	Country-wide study, used central point for Southern Brazil	-19.1533	-49.1394
85	Pereira et al.	2019	Farmer perception			?	?	Brazil	Itatiaia National Park														No	Yes	Locations within 50km of each other, approximate middle point found using GE	-22.2971	-44.7009
86	Pérez and Bulla	2000	Crop-feeding species behavior			1987	1990	Venezuela	El Socorro														Yes	No		8.99806	-65.7425
87	Perez and Pacheco	2006	Crop protection experiment	Crop damage evaluation		2001-07-01	2002-12-01	Bolivia	Chairo														No	Yes	Approximate middle point found using GE, based on named town	-16.2034	-67.8367
88	Perez and Pacheco	2014	Crop protection experiment	Crop damage evaluation		2003	2004	Bolivia	Cotapata														No	No	Approximate middle point found using GE, based on places named in article	-16.1986	-67.8994
89	Peyton	1980	Crop-feeding species behavior			1977-08-01	1979-08-01	Peru	Cordillera Occidental	Cordillera Central	Cordillera Oriental												No	Yes	Approximate locations found using GE, based on provided map	-7.94278	-77.6675	-10.8197	-75.5992	-13.6642	-70.4839
90	Poleo et al.	2010	Crop-feeding species behavior			1986	2004	Venezuela	Francisco de Miranda														No	No	Approximate location found using GE, based on named region	8.64722	-67.1897
91	Ranvaud et al.	2001	Crop-feeding species behavior			1994-08-01	1995-07-01	Brazil	Paranapanema Valley														Yes	Yes		-22.7833	-50.5833
92	Renfrew and Saavedra	2007	Crop-feeding species behavior	Farmer perception		2005-01-01	2006-03-01	Bolivia	Okinawa	San Juan	Trinidad												Yes	Yes	Locations in each area within 50km of each other, approximate middle points found using GE, based on study site coordinates	-17.2186	-62.8952	-17.1133	-63.9375	-14.8797	-64.8525
93	Renfrew et al.	2017	Crop-feeding species behavior			2006	2008	Argentina, Bolivia	Trinidad	San Juan	Santa Olga												Yes	No		-15.761	-64.157	-25.924	-58.535
94	Robles et al.	2003	Crop protection experiment	Crop damage evaluation		1999-12-01	2000-05-01	Peru	Huancayo														Yes	No		-12.1167	-75.2
95	Rocha and Fortes	2015	Farmer perception			2010-09-01	2012-01-01	Brazil	Agudo and Nova Palma														Yes	No		-29.4472	-53.2806
96	Rodriguez and Avery	1996	Pest species or outbreak overview			-	-	Uruguay															No	No	Country-wide study, used central point for Uruguay	-32.5228	-55.7672
97	Rodriguez et al.	1995	Crop protection experiment	Crop damage evaluation		?	?	Uruguay	Colonia Young														No	No	Approximate locations found using GE, based on named cities	-34.1209	-57.7018	-32.6984	-57.6357
98	Rodriguez et al.	2004	Farmer perception	Crop damage evaluation				Uruguay	Canelones														No	No	Approximate location found using GE, based on named region	-34.5425	-55.9434
99	Romero-Balderas et al.	2006	Crop damage evaluation	Farmer perception		2004-02-01	2004-09-01	Mexico	La Selva Laconda														No	Yes	Locations within 50 km of each other, Approximate middle point found using GE, based on provided map	16.137	-90.8916
100	Rosa et al.	2018	Protection technique evaluation			2014-01-01	2015-08-01	Brazil	Itamonte	Santana do Livramento													Yes	Yes		-22.35	-44.7833	-30.8833	-55.5167
101	Sanchez et al.	2016	Crop damage evaluation			2007-10-01	2008-05-01	Argentina	Patagones	Adolfo Alsina													No	Yes	Approximate location found using GE, based on provided map	-41.0461	-62.873
102	Sanchez-Cordero and Martinez-Meyer	2000	Pest species or outbreak overview					Mexico	Veracruz														No	Yes	Study involves the whole state, location of central point of the state	18.4572	-95.3997
103	Santos	2018	Pest species or outbreak overview	Farmer perception		1978	2010	Brazil	Low San Fancisco Sergipano														No	No	Approximate location found using GE, based on named region	-10.3326	-36.8667
104	Saucedo et al.	2010	Farmer perception	Crop damage evaluation		2007-05-01	2008-10-01	Cuba	Villa Clara														No	Yes	Approximate location found using GE, based on named region	22.495	-79.9206
105	Silva-Andrade et al.	2016	Farmer perception			2013-08-01	?	Brazil	Jupi														Yes	Yes		-8.71167	-36.415
106	Silva-Rodríguez et al.	2006	Farmer perception			2006-01-01	2006-11-01	Chile	Centinela														Yes	No		-40.2333	-73.0667
107	Spagnoletti et al.	2017	Farmer perception	Crop damage evaluation		2013-04-01	2014-05-01	Brazil	Gilbues														Yes	Yes	Locations within 50km of each other, approximate middle point found using GE	-9.63106	-45.4184	-9.64706	-45.4332	-9.61732	-45.4314
108	Trivedi et al.	2004	Crop damage evaluation			2000-04-01	2000-07-01	Peru	Madre de Dios														Yes	No		-12.6508	-68.9278
109	Valencia	1980	Crop damage evaluation	Crop protection experiment		?	?	Colombia	San Andres Island	Gorgona Island	Tumaco	Dibulla											No	Yes	Approximate locations found using GE, based on provided map	12.5405	-81.7043	2.96833	-78.1844	1.78743	-78.7648	11.2724	-73.3093
110	Valencia et al.	1994	Pest species or outbreak overview					Colombia	San Andres Island	Pacific coast	East plains	Andean mountains	Atlantic coast	Magdalena river									No	Yes	Approximate locations found using GE, based on provided map	12.5405	-81.7043	1.75694	-78.4639	2.39917	-71.495	5.05667	-72.8864	8.53306	-76.0842	8.95444	-73.9036
111	Villa et al.	1998	Crop-feeding species behavior			1994-05-01	1995-04-01	Mexico	Papaloapan Basin														Yes	No	Approximate middle point found using GE	18°08' to 18°20'N	95°55' to 96°20'W
112	Villafana-Martin et al.	1999	Crop protection experiment			?	?	Costa Rica	?														No	No	Location information not provided. Used approximate central point for Costa Rica	9.91681	-84.0743
113	Waters	2015	Farmer perception			2006-03-01	2006-05-01	Belize															No	No	Country-wide study, specific locations not informed, used central point for Belize	17.1917	-88.4989
[truncated: 117 more columns]
